# Supplementary material
Source: Research Square preprint supplement (doi:10.21203/rs.3.rs-9015194/v1)
Supplement: Supplementary file 1 [file f3dbc15aef996fb76369b6c1.docx]

**Tailoring Antimicrobial Polypropylene with Dual-Metal Oxide Systems: Hydrothermal Versus Commercial Approaches Against Key Bloodstream Pathogens**

G Ambarasan Govindasamy1, Srimala Sreekantan2,*, Geethaa Sahgal3, Priscilla Jayanthi Thavamany4, Ming Thong Ong4, Khairul Arifah Saharudin5, Aik Aun Tan6

1Ann Joo Steel Bhd, Lot 1236, Prai Industrial Estate, 13600 Prai, Penang, Malaysia

2School of Materials and Mineral Resources Engineering, Engineering Campus, Universiti Sains Malaysia, 14300 Nibong Tebal, Penang, Malaysia

3Faculty of Pharmacy, AIMST University, Bedong, 08100 Semeling, Kedah, Malaysia

4Institute for Research in Molecular Medicine (INFORMM), Universiti Sains Malaysia, 11800 Pulau Pinang, Malaysia

5Qdos Interconnect Sdn Bhd, PMT 743, Persiaran Cassia Selatan 4, Batu Kawan Industrial Park, 14110 Batu Kawan, Pulau Pinang, Malaysia

6B. Braun Medical Industries Sdn Bhd, P.O. Box 880,10810 Pulau Pinang, Malaysia

*Address all correspondence to this author. e-mail: [srimala@usm.my](mailto:srimala@usm.my)


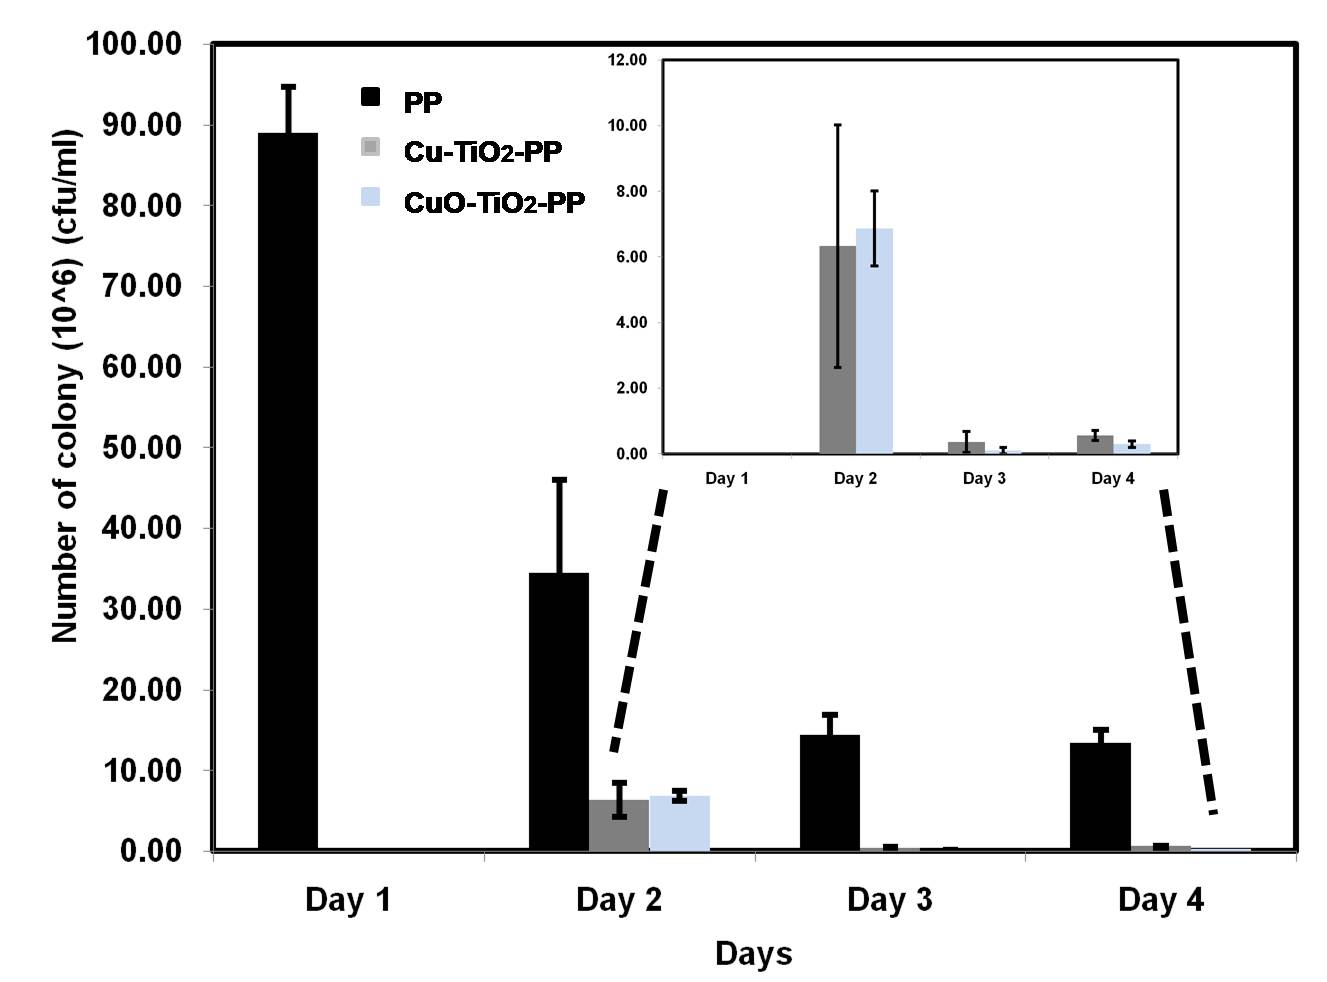


**Figure 1. *Candida albicans* attachment on control PP, Cu-TiO2-PP and CuO-TiO2-PP for 4 days**


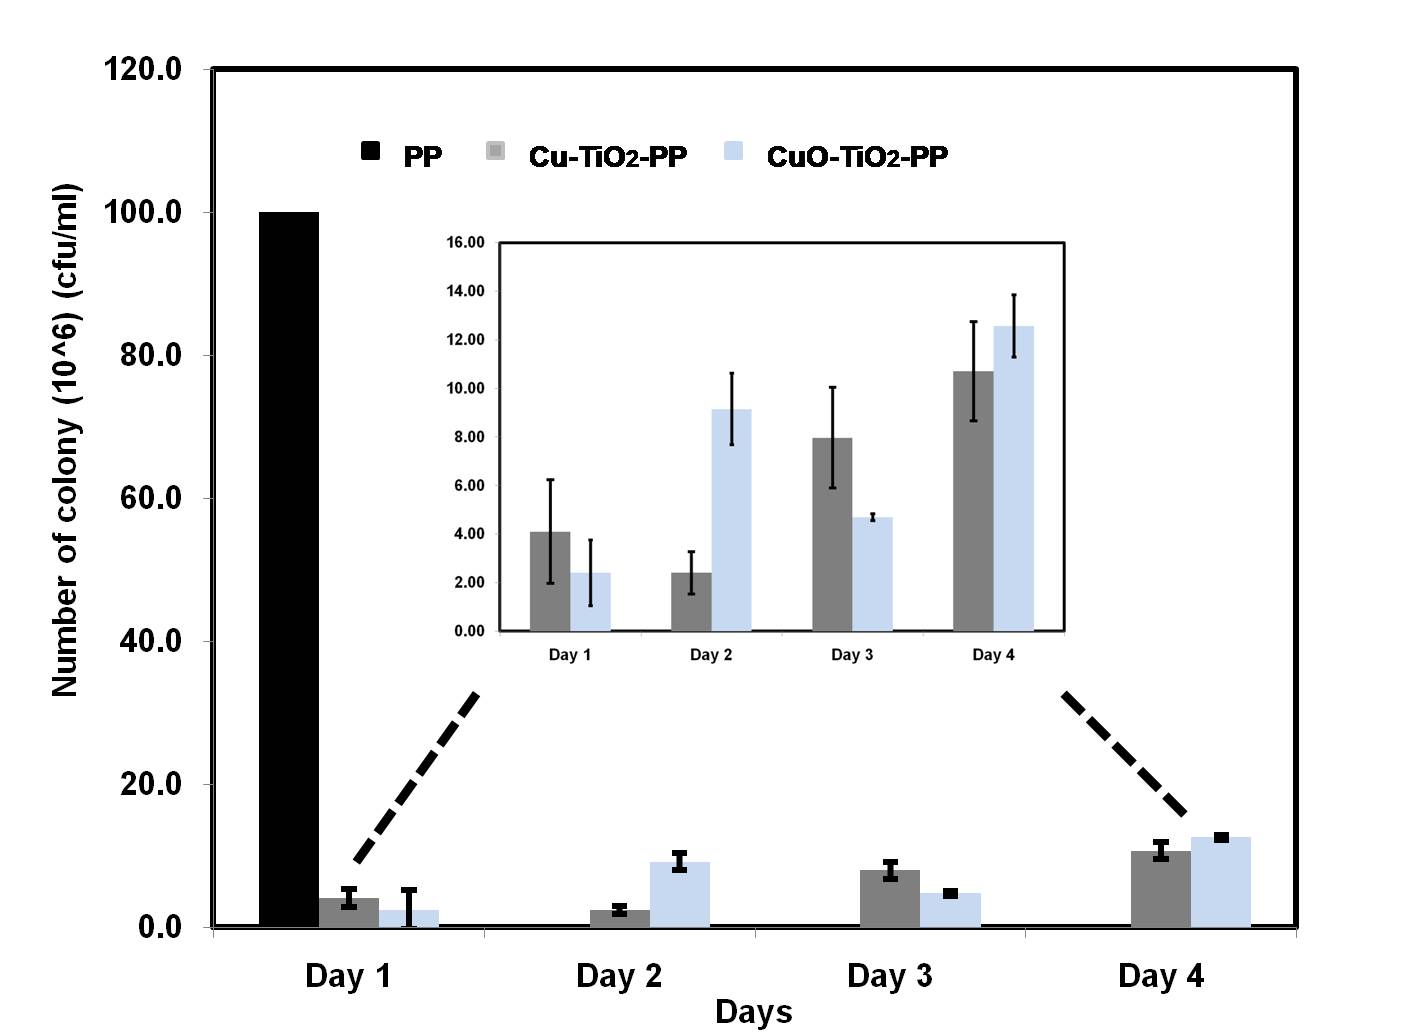


**Figure 2. *Staphylococcus epidermidis* attachment on control PP, Cu-TiO2-PP and CuO-TiO2-PP for 4 days**
